# Supplementary material for: Singlet diradicaloids as n-type passivating interlayers for CsPbI 3 perovskite solar cells
Source: Royal Society of Chemistry journal article supplement (doi:10.1039/d5ta04509f), 2025-01-01
Supplement: d5ta04509f1.pdf [file d5ta04509f1.pdf]

## Supporting Information

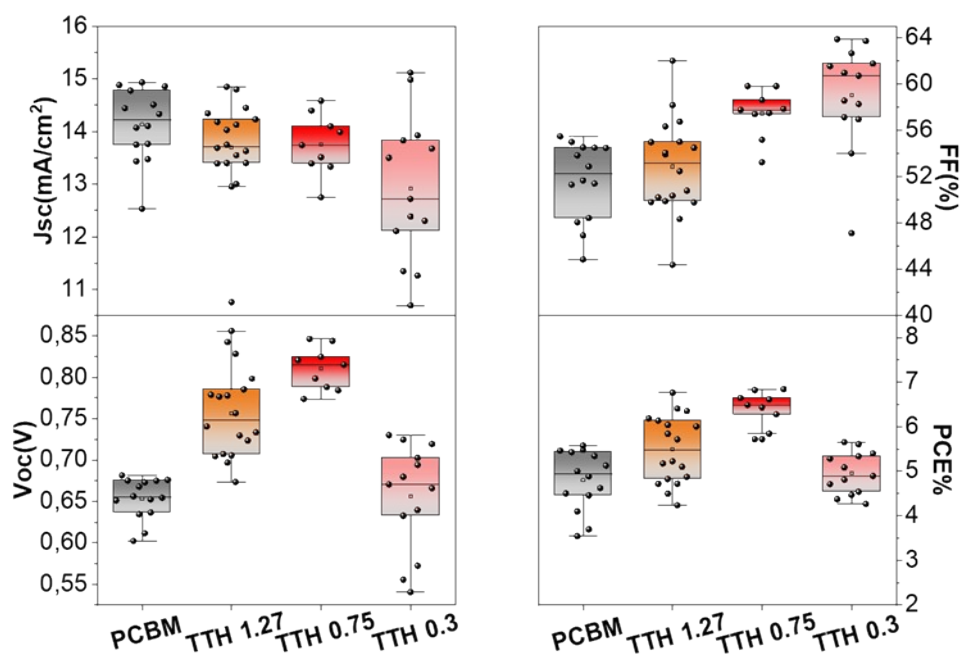

**Supplementary Figure S1 I** Statistical photovoltaic parameters obtained for PCBM and TTH at different concentrations 1,27mg/ml; 0,75mg/ml and 0,3mg/ml in CB.

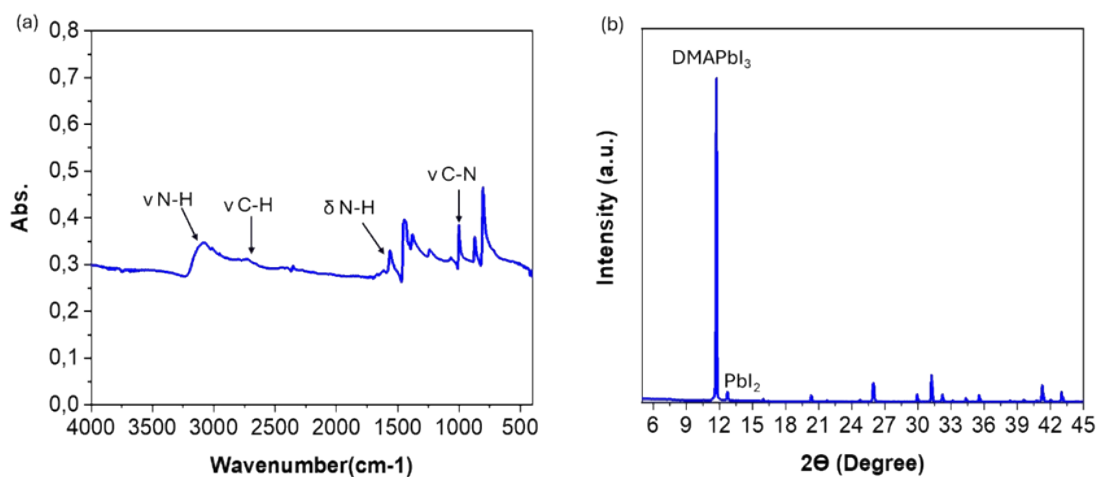

**Supplementary Figure S2 I** The ATR-FTIR (a) and XRD patterns (b) of synthesizing DMAPbI<sub>3</sub> powder precursor.

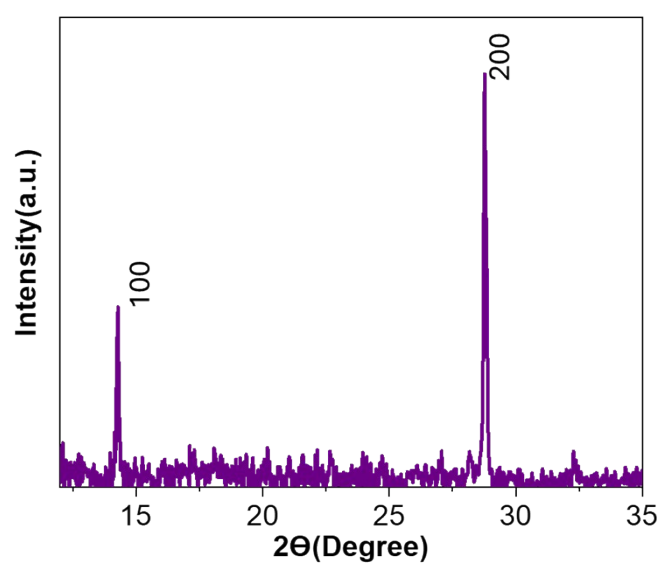

**Supplementary Figure 3 I** XRD patterns of CsPbI<sub>3</sub> powder precursor.

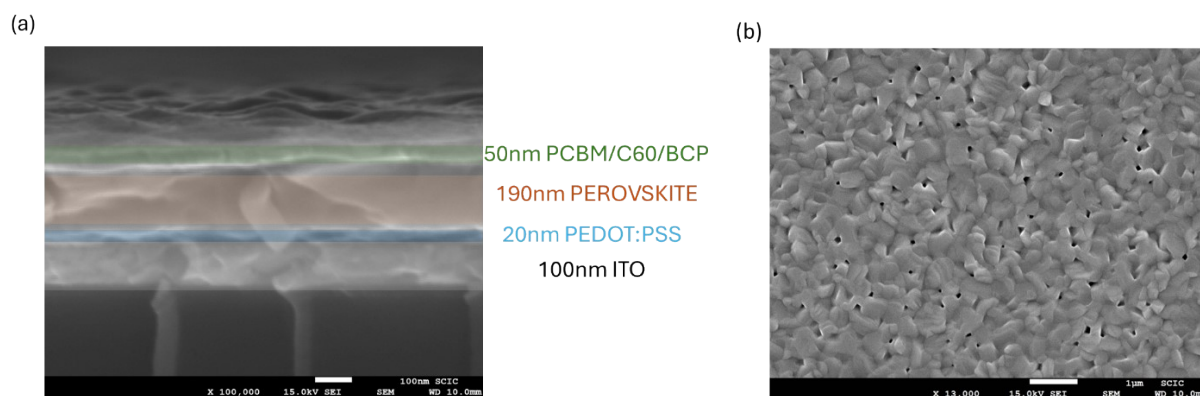

**Supplementary Figure 4 I** The cross-section and surface SEM images of the stack cell (a) and CsPbI<sub>3</sub> perovskite film (b).

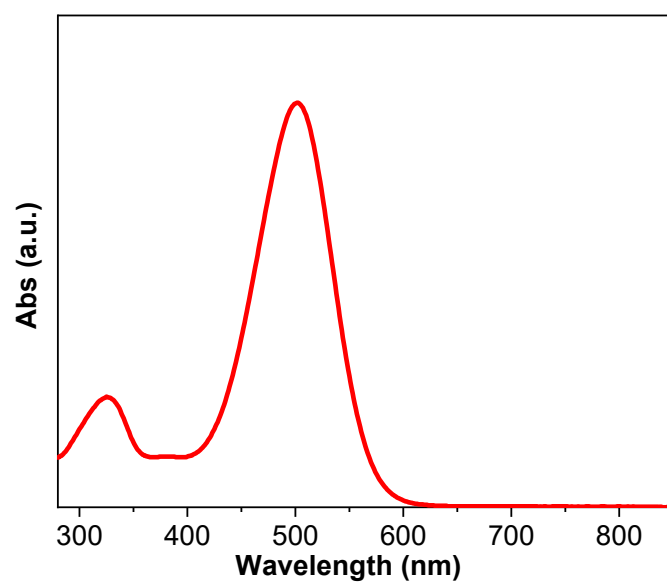

**Supplementary Figure 5 I** Absorption spectra of TTH molecule.

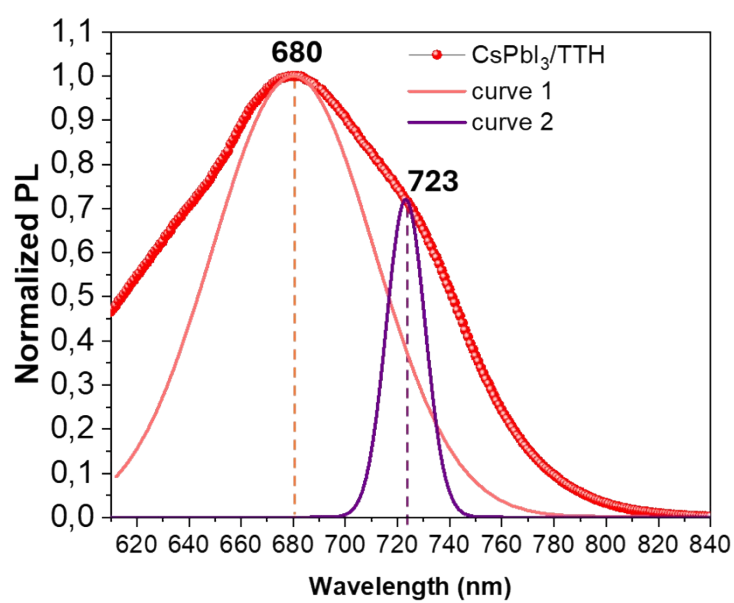

**Supplementary Figure 6 I** Deconvolution of photoluminescence from CsPbI<sub>3</sub>/TTH sample.

**Supplementary Table 1 I** Elemental quantification of CsPbI<sub>3</sub> (Cs), CsPbI<sub>3</sub> + PCBM (PCBM) and CsPbI<sub>3</sub> + TTH (TTH) perovskites by XPS.

| Sample Identifier | Atomic concentration [%] |      |       |       |       |      |      |
|-------------------|--------------------------|------|-------|-------|-------|------|------|
|                   | C                        | O    | I     | Pb    | Cs    | Cl   | N    |
| Cs                | 24.98                    | 4.96 | 42.61 | 10.70 | 16.75 | -    | -    |
| Cs+PCBM           | 56.66                    | 3.25 | 23.88 | 6.06  | 8.05  | -    | 2.10 |
| Cs + TTH          | 28.00                    | 2.82 | 41.32 | 9.99  | 13.05 | 1.58 | 3.25 |

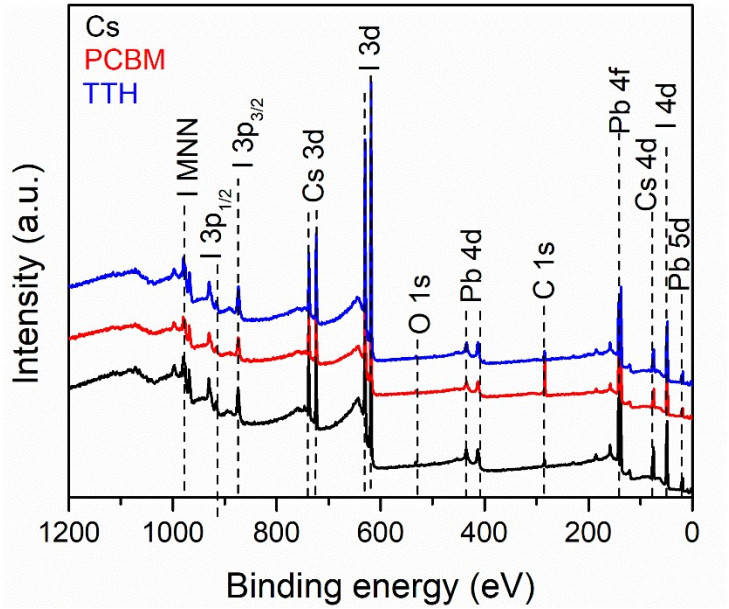

**Supplementary Figure 7 I** XPS survey spectra of CsPbI<sub>3</sub> (Cs), CsPbI<sub>3</sub> + PCBM (PCBM) and CsPbI<sub>3</sub> + TTH (TTH) perovskites.

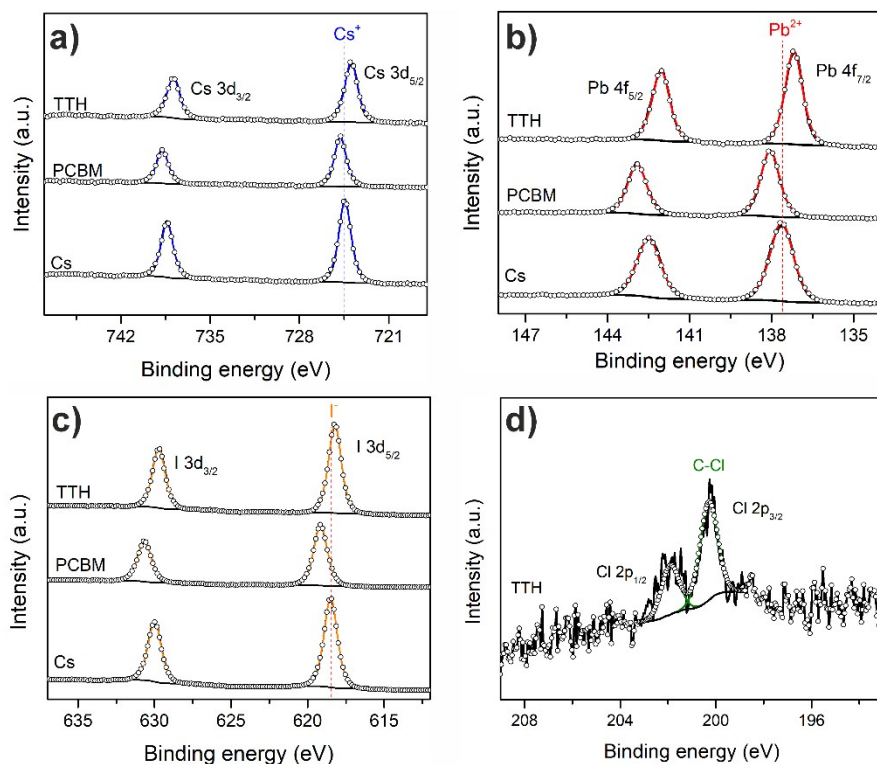

**Supplementary Figure 8 I** XPS high-resolution spectra of CsPbI<sub>3</sub> (Cs), CsPbI<sub>3</sub> + PCBM (PCBM) and CsPbI<sub>3</sub> + TTH (TTH) samples, a) Cs 3d, b) Pb 4f, c) I 3d and d) Cl 2p.

### Calculated Adsorption Energies ( $\Delta E_{\text{ads}}$ )

**Supplementary Table 2 I** Adsorption Energies for one ETL molecule (PCBM and TTH) with and without D3 dispersion interactions for the half and full coverage interfaces.

| Coverage | System                    | $\Delta E_{\text{ads}}$ w D3 | $\Delta E_{\text{ads}}$ w/o D3 |
|----------|---------------------------|------------------------------|--------------------------------|
| Half     | CsPbI <sub>3</sub> @1TTH  | -0.80                        | 0.00                           |
|          | CsPbI <sub>3</sub> @1PCBM | -1.49                        | -0.14                          |
| Full     | CsPbI <sub>3</sub> @2TTH  | -0.84                        | -0.01                          |
|          | CsPbI <sub>3</sub> @2PCBM | -1.81                        | -0.13                          |

As we can see, by moving from the half to full coverage the  $\Delta E_{\text{ads}}$  per molecule is increasing indicating a stabilizing effect due to the molecules packing. This effect is more pronounced in the PCBM case.
